# Supplementary material for: Clinical and transcriptional signatures of human CD204 reveal an applicable marker for the protumor phenotype of tumor-associated macrophages in breast cancer
Source: publisher site journal article supplement (doi:10.18632/aging.102490), 2019-12-04
Supplement: Supplementary file [file aging-v11i23-102490-supplementary-material-SD1.pdf]

# SUPPLEMENTARY FIGURE

## Luminal A

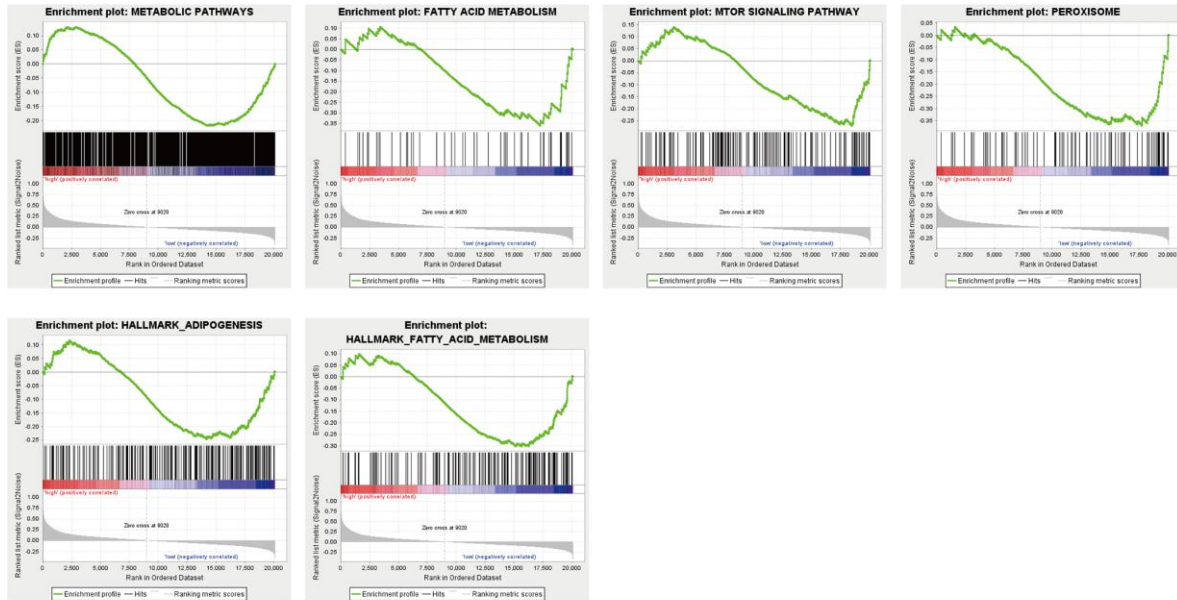

## Luminal B

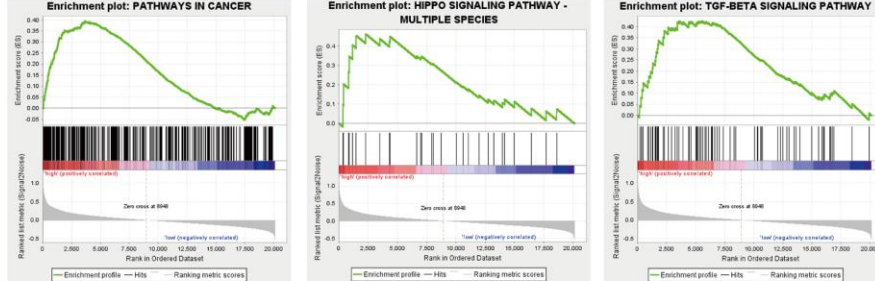

## HER-2

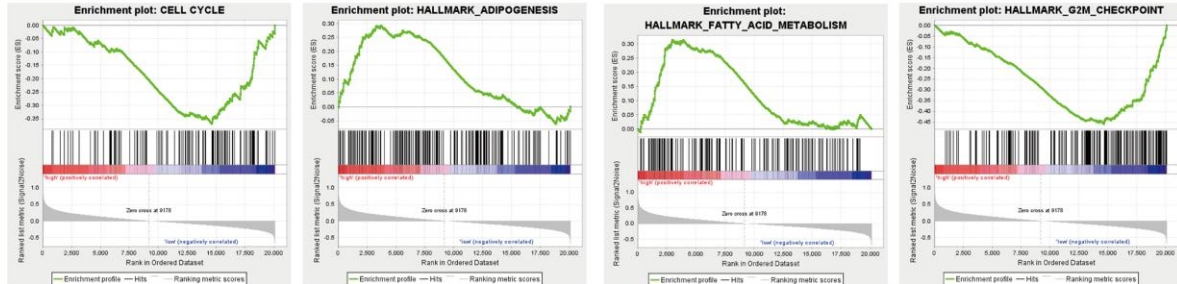

## Basal-like

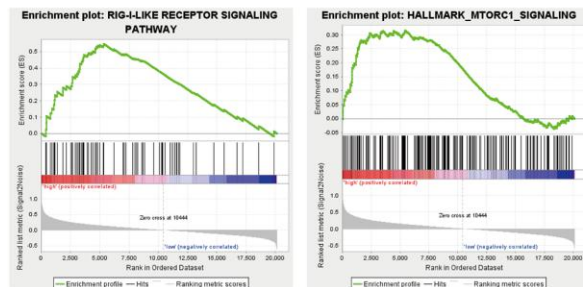

Supplementary Figure 1. Detailed and representative special pathways in each subtype influenced by CD204.
